# Supplementary material for: Exosome-mediated miR-7-5p delivery enhances the anticancer effect of Everolimus via blocking MNK/eIF4E axis in non-small cell lung cancer
Source: PubMed Central journal article supplement (PMC8827062; doi:10.1038/s41419-022-04565-7), 2022-02-08

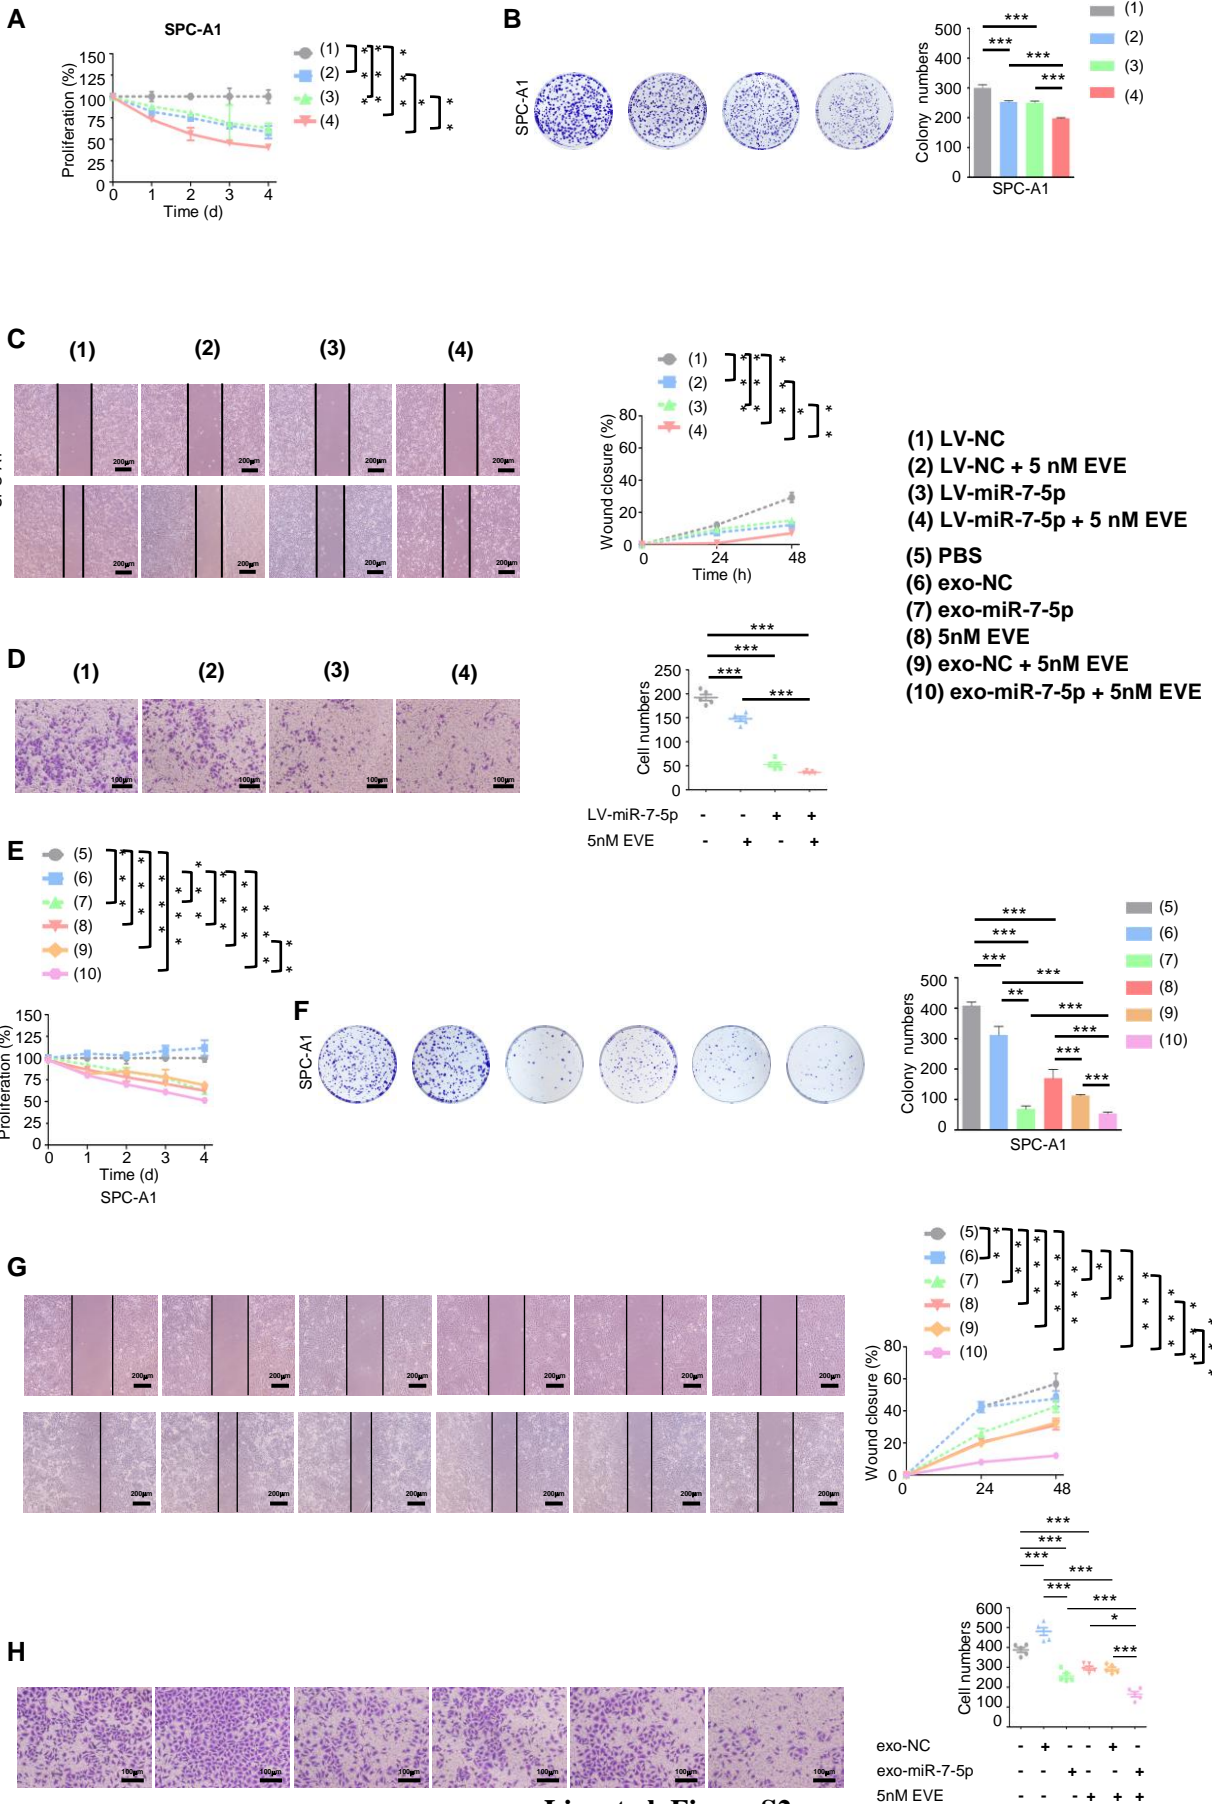

Supplement: 41419_2022_4565_MOESM3_ESM.pdf [file 41419_2022_4565_MOESM3_ESM.pdf]
